# Supplementary material for: A structurally self-assembled peptide nano-architecture by one-step electrospinning
Source: Royal Society of Chemistry journal article supplement (doi:10.1039/c6tb01164k), 2016-01-01
Supplement: c6tb01164k1.pdf [file c6tb01164k1.pdf]

## Supporting Information

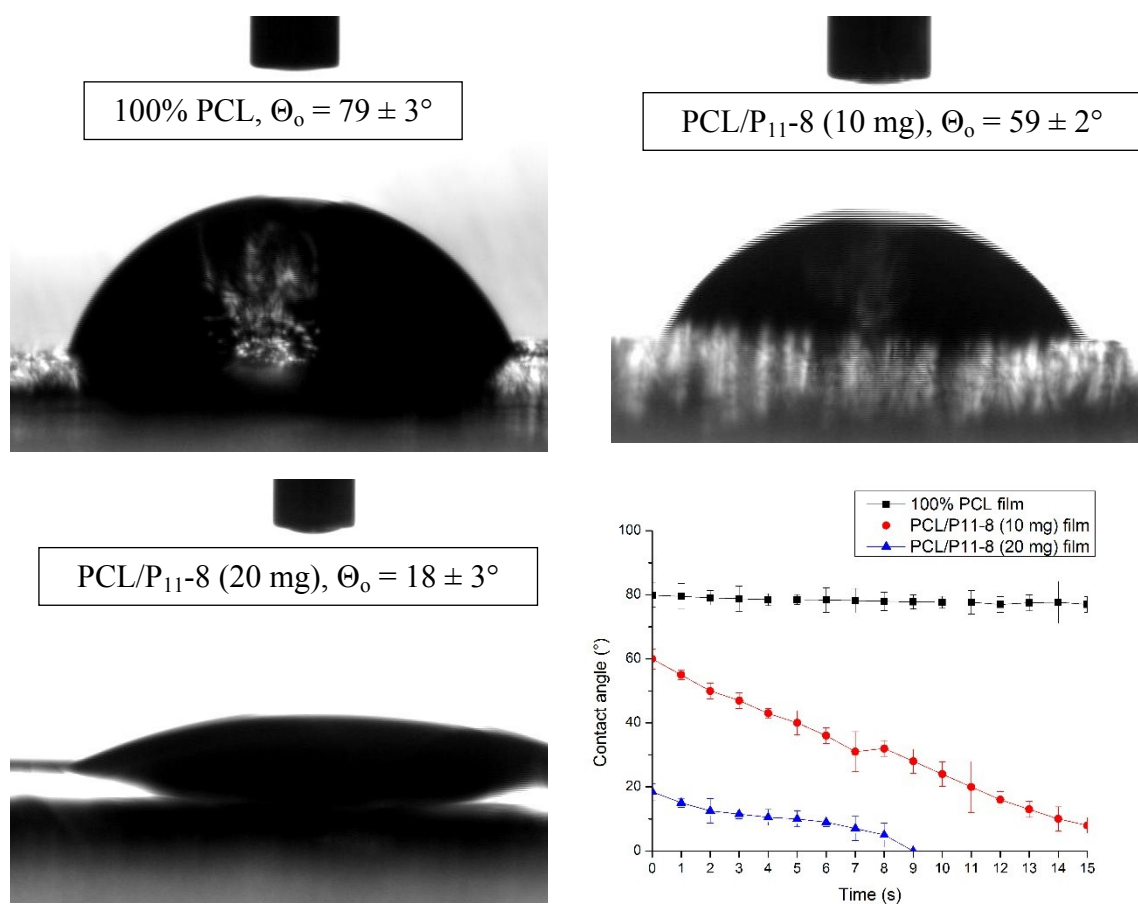

Figure S1. Contact angle of water on PCL and PCL/P<sub>11</sub>-8 cast films showing enhanced hydrophilicity with increased peptide concentration.

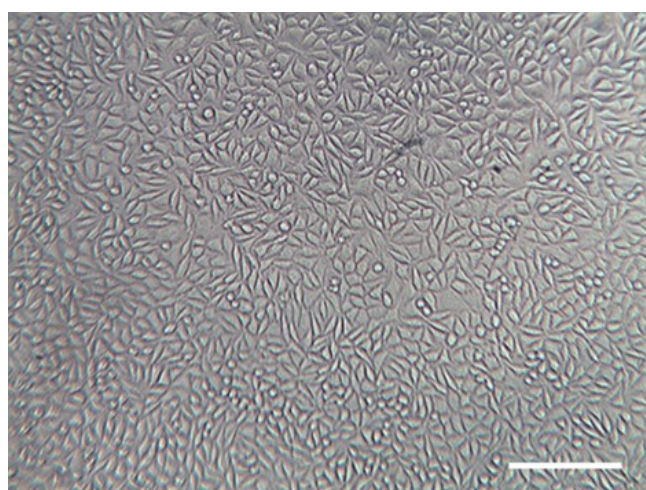

Figure S2. Light microscopy image of L929 cells cultured in DMEM as a control sample. Scale bar  $\sim 200 \mu\text{m}$ .
